# Supplementary material for: Mobile Laboratory Reveals the Circulation of Dengue Virus Serotype I of Asian Origin in Medina Gounass (Guediawaye), Senegal
Source: MDPI journal article supplement (doi:10.3390/diagnostics10060408), 2020-06-16
Supplement: s1 [file s1]

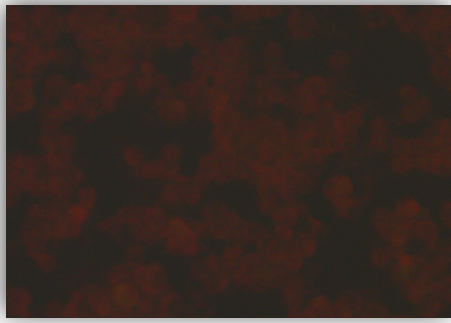

A

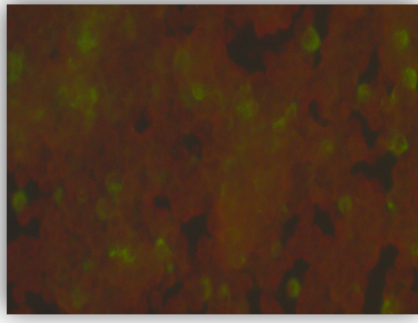

B

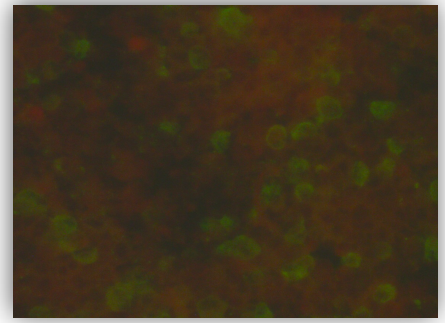

C

**Figure S1:** Assessment of Dengue virus infection using immunofluorescence Indirect Assay (IFA) on C6/36 cells infected with 200  $\mu$ l of crushed mouse brain previously inoculated with Positive Sera. Immune Ascite fluid were used as Primary antibody (A: Negative control, B : Medina Gounass 1, C : Medina Gounass 2)
